# Supplementary figures and images for: Evaluation of Osteogenic Potential of Fucoidan Containing Chitosan Hydrogel in the Treatment of Periodontal Intra-Bony Defects—A Randomized Clinical Trial
Source: MDPI journal article supplement (doi:10.3390/gels9070573), 2023-07-13

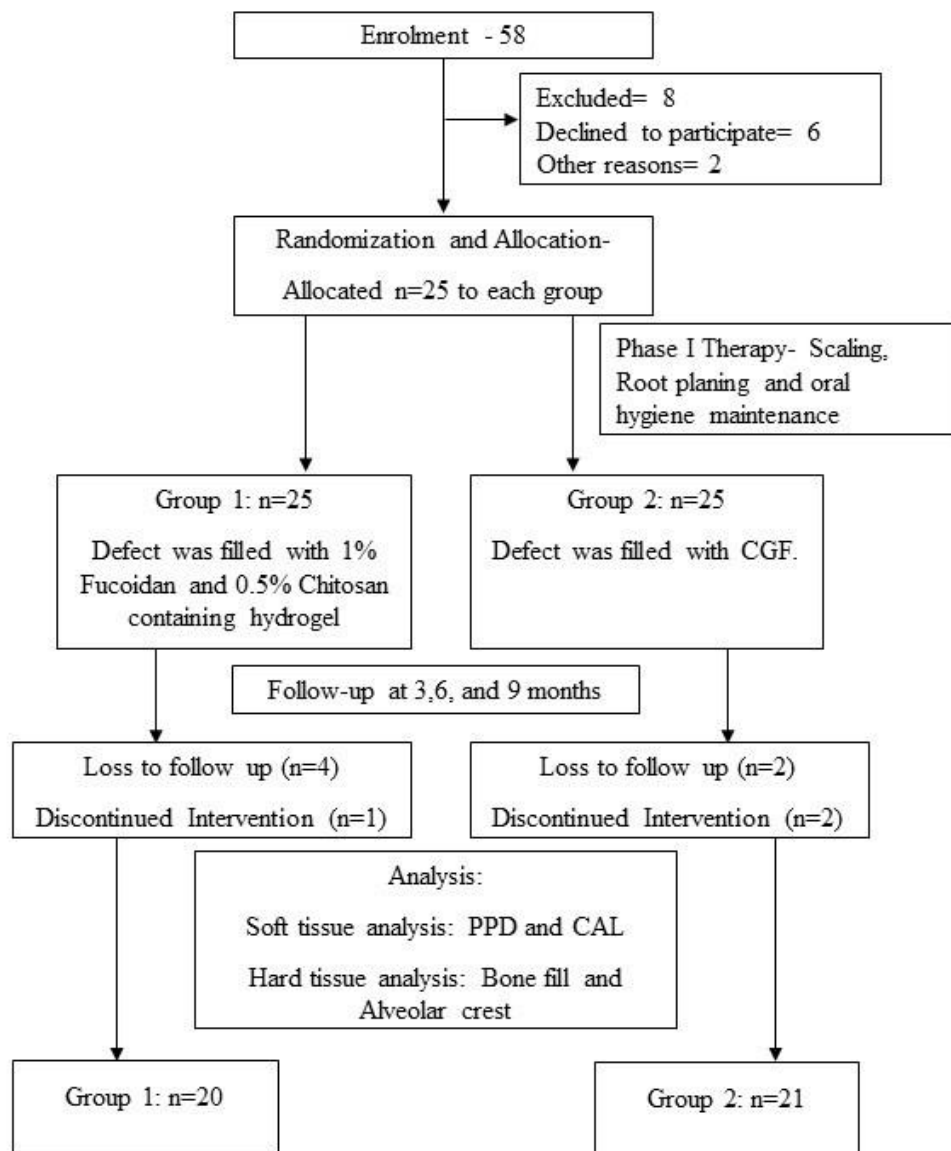

**Figure S1.** Framework of participant flow

Supplement: s1 [file s1]
